# Supplementary material
Source: MDPI journal article supplement (https://www.mdpi.com/2624-6511/3/3/36)
Supplement: s1 [file s1]

# Supplementary Material - Table S1

## Indicator pool and evaluation according to pre-defined criteria

|               |                                                                              | Evaluation Criteria |              |               |             |             | Score |
|---------------|------------------------------------------------------------------------------|---------------------|--------------|---------------|-------------|-------------|-------|
| KPI Dimension | KPIs (Green: Core / Blue: Supporting)                                        | Relevance           | Availability | Measurability | Reliability | Familiarity |       |
| Energy        |                                                                              |                     |              |               |             |             |       |
| Energy        | Energy demand and consumption                                                | 2                   | 1            | 2             | 2           | 2           | 9     |
| Energy        | Energy savings                                                               | 2                   | 1            | 2             | 2           | 2           | 9     |
| Energy        | Reduction in annual final energy consumption                                 | 2                   | 2            | 2             | 2           | 2           | 10    |
| Energy        | Electricity System Outage Frequency                                          | 2                   | 2            | 2             | 2           | 1           | 9     |
| Energy        | Electricity System Outage Time                                               | 2                   | 2            | 2             | 2           | 1           | 9     |
| Energy        | Degree of energetic self-supply by RES                                       | 2                   | 1            | 2             | 2           | 1           | 8     |
| Energy        | Increase in local renewable energy production                                | 2                   | 2            | 2             | 2           | 2           | 10    |
| Energy        | Renewable energy generated within the city                                   | 2                   | 1            | 2             | 2           | 2           | 9     |
| Energy        | Reduced energy curtailment of RES and DER                                    | 2                   | 1            | 2             | 1           | 1           | 7     |
| Energy        | Energy intensity (consumption / GDP)                                         | 2                   | 1            | 1             | 1           | 1           | 6     |
| Energy        | Individual building energy balance                                           | 2                   | 2            | 1             | 1           | 1           | 7     |
| Energy        | Specific Yield                                                               | 2                   | 1            | 2             | 1           | 1           | 7     |
| Energy        | Solar gain coefficient                                                       | 2                   | 2            | 2             | 1           | 1           | 8     |
| Energy        | kWp photovoltaic installed per 100 inhabitants                               | 2                   | 2            | 2             | 2           | 2           | 10    |
| Energy        | System performance                                                           | 2                   | 1            | 1             | 1           | 1           | 6     |
| Energy        | Generation system efficiency                                                 | 2                   | 1            | 1             | 1           | 1           | 6     |
| Energy        | Distribution system efficiency                                               | 2                   | 1            | 1             | 1           | 1           | 6     |
| Energy        | Consumption system efficiency                                                | 2                   | 1            | 1             | 1           | 1           | 6     |
| Energy        | Equipment energy efficiency                                                  | 2                   | 1            | 1             | 1           | 1           | 6     |
| Energy        | Smart Storage Capacity                                                       | 2                   | 1            | 2             | 1           | 1           | 7     |
| Energy        | Battery Degradation Rate                                                     | 2                   | 1            | 1             | 1           | 1           | 6     |
| Energy        | Storage Energy Losses                                                        | 2                   | 1            | 2             | 1           | 1           | 7     |
| Energy        | Maximum Hourly Deficit (MHDx)                                                | 2                   | 1            | 1             | 1           | 0           | 5     |
| Energy        | Capacity factor                                                              | 2                   | 1            | 2             | 1           | 1           | 7     |
| Energy        | Influence of energy storage on cutting peak demand                           | 2                   | 1            | 2             | 1           | 1           | 7     |
| Energy        | Storage capacity of the city's energy grid per total city energy consumption | 2                   | 1            | 1             | 1           | 1           | 6     |

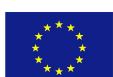

This project has received funding from the European Union's Horizon 2020 research and innovation programme under grant agreement N° 864400.

|                      |                                                                                                                                          |   |   |   |   |   |    |
|----------------------|------------------------------------------------------------------------------------------------------------------------------------------|---|---|---|---|---|----|
| Energy               | Storage system efficiency                                                                                                                | 2 | 1 | 1 | 1 | 1 | 6  |
| Energy               | Buildings served by the district heating                                                                                                 | 2 | 1 | 1 | 1 | 1 | 6  |
| Energy               | Thermal load reduction                                                                                                                   | 2 | 1 | 2 | 1 | 1 | 7  |
| Energy               | Heat recovery ratio                                                                                                                      | 2 | 1 | 2 | 1 | 1 | 7  |
| Energy               | Peak demand reduction                                                                                                                    | 2 | 1 | 2 | 1 | 1 | 7  |
| Energy               | Accuracy of energy supply and demand prediction                                                                                          | 2 | 1 | 1 | 1 | 1 | 6  |
| Energy               | Integrated Building Management Systems in Buildings                                                                                      | 2 | 2 | 2 | 1 | 1 | 8  |
| Energy               | Peak load and load profile of electricity demand                                                                                         | 2 | 1 | 2 | 1 | 1 | 7  |
| Energy               | Peak load and load profile of thermal energy demand                                                                                      | 2 | 1 | 2 | 1 | 1 | 7  |
| Energy               | Percentage of street lighting managed by a light performance management system                                                           | 2 | 1 | 2 | 2 | 2 | 9  |
| Energy               | Energy used for lighting                                                                                                                 | 1 | 2 | 2 | 2 | 2 | 9  |
| Energy               | Lighting energy efficiency                                                                                                               | 1 | 1 | 2 | 1 | 1 | 6  |
| Energy               | Percentage of buildings in the city with smart energy meters                                                                             | 2 | 1 | 2 | 2 | 2 | 9  |
| Energy               | Smart electricity meters                                                                                                                 | 2 | 2 | 2 | 1 | 1 | 8  |
| Energy               | Percentage of waste drop-off centres (containers) equipped with telemetering                                                             | 1 | 1 | 2 | 2 | 1 | 7  |
| Energy               | Percentage of the city population that has a door-to-door garbage collection with an individual monitoring of household waste quantities | 1 | 1 | 2 | 2 | 1 | 7  |
| Energy               | Percentage of total amount of waste in the city that is used to generate energy                                                          | 1 | 1 | 1 | 2 | 2 | 7  |
| Energy               | Percentage of public garbage bins that are sensor-enabled public garbage bins                                                            | 1 | 1 | 1 | 2 | 2 | 7  |
| Energy               | Cultural Heritage building preservation                                                                                                  | 2 | 1 | 2 | 1 | 1 | 7  |
| Energy               | Refurbished buildings improving energy performance                                                                                       | 2 | 1 | 1 | 1 | 1 | 6  |
| <b>Environmental</b> |                                                                                                                                          |   |   |   |   |   |    |
| Environmental        | Greenhouse Gas Emissions                                                                                                                 | 2 | 2 | 2 | 2 | 2 | 10 |
| Environmental        | Primary Energy Demand and Consumption                                                                                                    | 2 | 1 | 1 | 2 | 1 | 7  |
| Environmental        | Carbon dioxide Emission Reduction                                                                                                        | 2 | 2 | 2 | 2 | 2 | 10 |
| Environmental        | Reduction in lifecycle CO <sub>2</sub> emissions                                                                                         | 2 | 0 | 1 | 1 | 1 | 5  |
| Environmental        | Climate resilience measures                                                                                                              | 1 | 2 | 1 | 1 | 2 | 7  |
| Environmental        | Climate resilience strategy                                                                                                              | 2 | 2 | 1 | 1 | 2 | 8  |
| Environmental        | Decreased emissions of Nitrogen oxides (NO <sub>x</sub> )                                                                                | 1 | 1 | 1 | 2 | 1 | 6  |
| Environmental        | Nitrogen oxide emissions (Nox)                                                                                                           | 1 | 1 | 2 | 2 | 1 | 7  |
| Environmental        | Decreased emissions of Particulate matter (PM <sub>2.5</sub> )                                                                           | 2 | 1 | 1 | 2 | 1 | 7  |
| Environmental        | Fine particulate matter emissions (or concentration) (PM <sub>2.5</sub> )                                                                | 2 | 1 | 2 | 2 | 1 | 8  |
| Environmental        | Number of days particulate matter PM <sub>10</sub> concentrations exceed 50 µg/m <sup>3</sup>                                            | 2 | 1 | 2 | 2 | 1 | 8  |
| Environmental        | Annual average concentration of PM <sub>10</sub>                                                                                         | 2 | 1 | 2 | 2 | 1 | 8  |
| Environmental        | Sulphur dioxide levels                                                                                                                   | 1 | 1 | 2 | 2 | 1 | 7  |
| Environmental        | O <sub>3</sub> emissions (or concentration)                                                                                              | 1 | 1 | 2 | 2 | 1 | 7  |
| Environmental        | Indoor air quality                                                                                                                       | 1 | 0 | 2 | 1 | 2 | 6  |

|                 |                                                                                                                                                                                                        |   |   |   |   |   |    |
|-----------------|--------------------------------------------------------------------------------------------------------------------------------------------------------------------------------------------------------|---|---|---|---|---|----|
| Environmental   | Air quality index (Air pollution)                                                                                                                                                                      | 2 | 1 | 2 | 2 | 1 | 8  |
| Environmental   | Reduced exposure to noise pollution                                                                                                                                                                    | 2 | 1 | 1 | 1 | 2 | 7  |
| Environmental   | Noise pollution                                                                                                                                                                                        | 2 | 1 | 2 | 2 | 2 | 9  |
| Environmental   | EMF Exposure                                                                                                                                                                                           | 1 | 0 | 2 | 1 | 0 | 4  |
| Environmental   | Urban Heat Island                                                                                                                                                                                      | 1 | 1 | 2 | 2 | 1 | 7  |
| Environmental   | Reduction in the amount of solid waste collected                                                                                                                                                       | 1 | 1 | 2 | 1 | 2 | 7  |
| Environmental   | Municipal solid waste                                                                                                                                                                                  | 2 | 1 | 2 | 2 | 2 | 9  |
| Environmental   | Recycling Rate                                                                                                                                                                                         | 2 | 1 | 2 | 2 | 2 | 9  |
| Environmental   | Percentage of city population with regular solid waste collection (residential)                                                                                                                        | 1 | 1 | 2 | 1 | 1 | 6  |
| Environmental   | Percentage of the city's solid waste that is treated in energy-from-waste plants                                                                                                                       | 2 | 1 | 2 | 1 | 1 | 7  |
| Environmental   | Percentage of the city's solid waste that is biologically treated and used as compost or biogas                                                                                                        | 1 | 1 | 2 | 1 | 1 | 6  |
| Environmental   | Percentage of electrical and thermal energy produced from wastewater treatment, solid waste and other liquid waste treatment and other waste heat resources, as a share of the city's total energy mix | 2 | 1 | 1 | 1 | 1 | 6  |
| Environmental   | Electrical and thermal energy (GJ) produced from solid waste or other liquid waste treatment per year                                                                                                  | 2 | 1 | 2 | 1 | 1 | 7  |
| Environmental   | Solid Waste Treatment                                                                                                                                                                                  | 1 | 1 | 2 | 1 | 1 | 6  |
| <b>Economic</b> |                                                                                                                                                                                                        |   |   |   |   |   |    |
| Economic        | Grants                                                                                                                                                                                                 | 1 | 2 | 2 | 1 | 2 | 8  |
| Economic        | Total Investments                                                                                                                                                                                      | 2 | 2 | 2 | 2 | 2 | 10 |
| Economic        | Total Annual costs                                                                                                                                                                                     | 2 | 1 | 2 | 2 | 2 | 9  |
| Economic        | €M reduction compared to planned investment                                                                                                                                                            | 2 | 1 | 1 | 1 | 2 | 7  |
| Economic        | Total annual revenues                                                                                                                                                                                  | 1 | 1 | 2 | 1 | 2 | 7  |
| Economic        | Payback period                                                                                                                                                                                         | 2 | 1 | 2 | 2 | 2 | 9  |
| Economic        | Return on Investment (ROI)                                                                                                                                                                             | 2 | 1 | 2 | 2 | 1 | 8  |
| Economic        | Net Present Value (NPV)                                                                                                                                                                                | 1 | 1 | 2 | 2 | 1 | 7  |
| Economic        | Internal rate of return (IRR)                                                                                                                                                                          | 1 | 1 | 2 | 2 | 1 | 7  |
| Economic        | Gross Domestic Product                                                                                                                                                                                 | 1 | 2 | 1 | 2 | 1 | 7  |
| Economic        | Percentage of the ICT sector on GDP                                                                                                                                                                    | 1 | 1 | 1 | 1 | 1 | 5  |
| Economic        | Improved competitiveness of electricity market                                                                                                                                                         | 1 | 1 | 1 | 1 | 1 | 5  |
| Economic        | Average electricity price for companies and consumers                                                                                                                                                  | 2 | 2 | 2 | 1 | 2 | 9  |
| Economic        | Increased use of local workforce                                                                                                                                                                       | 1 | 2 | 2 | 1 | 2 | 8  |
| Economic        | Percentage of the total Distributed Energy Resources capacity traded                                                                                                                                   | 2 | 1 | 2 | 2 | 2 | 9  |
| Economic        | Local job creation                                                                                                                                                                                     | 2 | 2 | 1 | 2 | 2 | 9  |
| Economic        | Green jobs                                                                                                                                                                                             | 1 | 2 | 1 | 1 | 1 | 6  |
| Economic        | City's unemployment rate (CI: core indicator)                                                                                                                                                          | 0 | 2 | 1 | 2 | 2 | 7  |
| Economic        | Energy poverty                                                                                                                                                                                         | 2 | 1 | 1 | 1 | 2 | 7  |
| Economic        | Percentage of population living below the international poverty line (CI)                                                                                                                              | 0 | 1 | 1 | 1 | 2 | 5  |

|          |                                                                                                                                         |   |   |   |   |   |    |
|----------|-----------------------------------------------------------------------------------------------------------------------------------------|---|---|---|---|---|----|
| Economic | Certified companies involved in the project                                                                                             | 1 | 2 | 1 | 2 | 1 | 7  |
| Economic | Share of certified companies                                                                                                            | 1 | 1 | 1 | 2 | 1 | 6  |
| Economic | Green public procurement                                                                                                                | 1 | 1 | 1 | 1 | 1 | 5  |
| Economic | Share of Green Public Procurement                                                                                                       | 1 | 1 | 1 | 1 | 1 | 5  |
| Economic | CO2 reduction cost efficiency                                                                                                           | 2 | 1 | 1 | 1 | 2 | 7  |
| Economic | Financial benefit for the end- user                                                                                                     | 2 | 1 | 2 | 1 | 1 | 7  |
| Economic | Involvement of extraordinary professionals                                                                                              | 1 | 1 | 1 | 1 | 1 | 5  |
| Economic | Innovation hubs in the city                                                                                                             | 1 | 2 | 1 | 2 | 1 | 7  |
| Economic | R&D expenditure                                                                                                                         | 1 | 2 | 2 | 1 | 1 | 7  |
| Economic | New business creation                                                                                                                   | 2 | 2 | 1 | 2 | 2 | 9  |
| Economic | New startups                                                                                                                            | 1 | 2 | 2 | 2 | 2 | 9  |
| Economic | Stimulating an innovative environment                                                                                                   | 2 | 1 | 1 | 1 | 1 | 6  |
| Economic | Awareness of economic benefits of reduced energy consumption                                                                            | 2 | 1 | 1 | 1 | 2 | 7  |
| Economic | Incentives for final users for low carbon measures                                                                                      | 2 | 1 | 2 | 1 | 1 | 7  |
| Economic | Energy consumption reduction cost                                                                                                       | 2 | 1 | 2 | 1 | 1 | 7  |
| Economic | Expenditure in local economy (ELE)                                                                                                      | 1 | 1 | 2 | 1 | 1 | 6  |
| Economic | Impact in business unit (IBU)                                                                                                           | 1 | 1 | 1 | 1 | 1 | 5  |
| Economic | Number of patents per 100 000 population per year (SI)                                                                                  | 2 | 2 | 2 | 2 | 2 | 10 |
| Economic | Expenditures by the municipality for a transition towards a smart city                                                                  | 2 | 2 | 2 | 1 | 2 | 9  |
| Economic | Annual amount of revenues collected from the sharing economy as a percentage of own-source revenue                                      | 1 | 1 | 1 | 1 | 1 | 5  |
| ICT      |                                                                                                                                         |   |   |   |   |   |    |
| ICT      | Increased reliability                                                                                                                   | 2 | 1 | 1 | 1 | 1 | 6  |
| ICT      | Increased Power Quality and Quality of Supply (DSO+TSO)                                                                                 | 1 | 1 | 2 | 1 | 1 | 6  |
| ICT      | Increased system flexibility for energy players                                                                                         | 2 | 1 | 2 | 1 | 1 | 7  |
| ICT      | Reduction of energy price by ICT related technologies                                                                                   | 2 | 1 | 2 | 1 | 1 | 7  |
| ICT      | Peak load reduction                                                                                                                     | 2 | 1 | 2 | 1 | 1 | 7  |
| ICT      | Increased hosting capacity for RES, electric vehicles and other new loads                                                               | 2 | 1 | 2 | 2 | 1 | 8  |
| ICT      | Consumers engagement                                                                                                                    | 2 | 1 | 1 | 1 | 1 | 6  |
| ICT      | Developer engagement                                                                                                                    | 2 | 1 | 1 | 1 | 1 | 6  |
| ICT      | Cybersecurity & Level of Improvement (4ocalize Cybersecurity)                                                                           | 2 | 2 | 1 | 1 | 1 | 7  |
| ICT      | Data privacy - Data Safety & Level of Improvement (Improved Data Privacy)                                                               | 2 | 2 | 1 | 2 | 2 | 9  |
| ICT      | No. of operational apps that promote citizen engagements (adjusted the “Number of APIs connected to the Decision Support Tool (DST)”) ) | 2 | 1 | 1 | 1 | 1 | 6  |
| ICT      | Flexibility in delivery services & Level of Improvement (Improved Flexibility)                                                          | 2 | 2 | 1 | 1 | 1 | 7  |
| ICT      | Monitoring use of EV/FC charging stations                                                                                               | 2 | 1 | 2 | 1 | 1 | 7  |
| ICT      | Number of sensors integrated/devices connected                                                                                          | 2 | 1 | 2 | 1 | 1 | 7  |
| ICT      | Number of available Open Data sets/sources                                                                                              | 2 | 1 | 2 | 1 | 1 | 7  |

|                 |                                                                                              |   |   |   |   |   |    |
|-----------------|----------------------------------------------------------------------------------------------|---|---|---|---|---|----|
| ICT             | ICT Response time                                                                            | 2 | 2 | 2 | 1 | 1 | 8  |
| ICT             | ICT Availability                                                                             | 2 | 1 | 2 | 1 | 1 | 7  |
| ICT             | ICT Storage Capacity                                                                         | 2 | 1 | 2 | 1 | 1 | 7  |
| ICT             | Improved Interoperability                                                                    | 2 | 2 | 1 | 1 | 1 | 7  |
| ICT             | Cloud Solutions/Services                                                                     | 2 | 1 | 1 | 1 | 1 | 6  |
| ICT             | Data Center Capacity                                                                         | 1 | 1 | 1 | 2 | 1 | 6  |
| ICT             | Use of Open Data platform                                                                    | 2 | 1 | 1 | 1 | 1 | 6  |
| ICT             | Quality of Open Data                                                                         | 2 | 2 | 1 | 2 | 1 | 8  |
| ICT             | Open data based solutions                                                                    | 2 | 1 | 1 | 1 | 1 | 6  |
| ICT             | Electricity Supply ICT Monitoring                                                            | 1 | 2 | 1 | 2 | 1 | 7  |
| ICT             | Demand Response Penetration                                                                  | 1 | 1 | 1 | 1 | 1 | 5  |
| ICT             | Platform downtime                                                                            | 2 | 1 | 2 | 2 | 1 | 8  |
| <b>Mobility</b> |                                                                                              |   |   |   |   |   |    |
| Mobility        | Energy consumption data aggregated by sector fuel                                            | 2 | 1 | 1 | 1 | 1 | 6  |
| Mobility        | Kilometres of high capacity public transport system per 100 000 population                   | 1 | 1 | 2 | 2 | 2 | 8  |
| Mobility        | Passenger-kilometres public transport and private vehicle                                    | 1 | 2 | 1 | 2 | 2 | 8  |
| Mobility        | Electric Vehicles & Low-Carbon Emission Vehicles deployed in the area                        | 2 | 1 | 2 | 2 | 2 | 9  |
| Mobility        | Number of Evs charging stations and solar powered V2G charging stations deployed in the area | 2 | 2 | 2 | 2 | 2 | 10 |
| Mobility        | Impact of ICT apps into mobility                                                             | 2 | 1 | 1 | 1 | 1 | 6  |
| Mobility        | Car pooling locations                                                                        | 2 | 2 | 2 | 1 | 1 | 8  |
| Mobility        | Clean mobility utilization                                                                   | 2 | 1 | 2 | 1 | 1 | 7  |
| Mobility        | Modal split (passengers, vehicles, trips)                                                    | 2 | 1 | 2 | 2 | 1 | 8  |
| Mobility        | Access to vehicle sharing solutions for city travel & Level of Improvement                   | 2 | 2 | 1 | 1 | 1 | 7  |
| Mobility        | Annual number of public transport per capita                                                 | 1 | 2 | 2 | 1 | 2 | 8  |
| Mobility        | Length of bike route network: Kilometres of bicycle paths and lanes per 100 000 population   | 1 | 2 | 2 | 2 | 2 | 9  |
| Mobility        | Number of personal automobiles per capita                                                    | 1 | 2 | 2 | 2 | 2 | 9  |
| Mobility        | Number of bikes (from bike sharing service) every 100 inhab                                  | 1 | 1 | 2 | 2 | 2 | 8  |
| Mobility        | Public Transport Network                                                                     | 1 | 2 | 2 | 2 | 1 | 8  |
| Mobility        | Public Transport Network Convenience OR Access to public transport                           | 1 | 1 | 2 | 2 | 1 | 7  |
| Mobility        | Percentage of commuters using a travel mode to work other than a personal vehicle (SI)       | 1 | 1 | 2 | 1 | 2 | 7  |
| Mobility        | Average commute time (SI)                                                                    | 0 | 1 | 2 | 1 | 2 | 6  |
| Mobility        | Number of users of sharing economy transportation per 100,000 population                     | 1 | 1 | 2 | 1 | 1 | 6  |
| Mobility        | Availability of real-time traffic information                                                | 1 | 1 | 1 | 1 | 2 | 6  |
| Mobility        | Yearly km of Shared Vehicles                                                                 | 2 | 2 | 2 | 2 | 2 | 10 |
| Mobility        | Percentage of vehicles registered in the city that are autonomous vehicles                   | 0 | 2 | 2 | 2 | 1 | 7  |

|               |                                                                                                                                                |   |   |   |   |   |    |
|---------------|------------------------------------------------------------------------------------------------------------------------------------------------|---|---|---|---|---|----|
| Mobility      | Percentage of roads conforming with autonomous driving systems                                                                                 | 0 | 1 | 2 | 2 | 1 | 6  |
| Mobility      | Total number of transport vehicles for passengers                                                                                              | 1 | 2 | 2 | 2 | 2 | 9  |
| Mobility      | Public charging points per eVehicle (EV)                                                                                                       | 2 | 2 | 2 | 2 | 2 | 10 |
| Mobility      | Annual Energy delivered by charging points -                                                                                                   | 2 | 1 | 2 | 2 | 2 | 9  |
| Mobility      | Total Number of recharges per year (public EV charging stations)                                                                               | 2 | 1 | 2 | 1 | 1 | 7  |
| Mobility      | Total operating time for EV charging operations                                                                                                | 2 | 1 | 2 | 2 | 1 | 8  |
| Mobility      | Average duration of EV charging operations                                                                                                     | 2 | 1 | 2 | 2 | 1 | 8  |
| Mobility      | Total Occupancy time of EV charging points                                                                                                     | 2 | 1 | 2 | 2 | 1 | 8  |
| Mobility      | Average Occupancy time of EV charging points                                                                                                   | 2 | 1 | 2 | 2 | 1 | 8  |
| Mobility      | Charging points powered by renewable energy sources (number and rate)                                                                          | 2 | 2 | 2 | 2 | 2 | 10 |
| Mobility      | Availability rate of the Solar Road                                                                                                            | 2 | 1 | 2 | 1 | 1 | 7  |
| Mobility      | Annual energy produced by <b>each</b> charging point or solar road                                                                             | 2 | 1 | 2 | 2 | 2 | 9  |
| Mobility      | Annual number of passengers (or users) of new infrastructure                                                                                   | 2 | 1 | 2 | 2 | 1 | 8  |
| Mobility      | Use of e-buses                                                                                                                                 | 2 | 2 | 2 | 1 | 1 | 8  |
| Mobility      | Availability rate of e-buses                                                                                                                   | 2 | 1 | 2 | 2 | 1 | 8  |
| Mobility      | Shared Electric Vehicles Penetration Rate                                                                                                      | 2 | 2 | 2 | 1 | 1 | 8  |
| <b>Social</b> |                                                                                                                                                |   |   |   |   |   |    |
| Social        | People reached                                                                                                                                 | 2 | 1 | 2 | 2 | 2 | 9  |
| Social        | Increased consciousness of citizenship                                                                                                         | 2 | 1 | 1 | 1 | 1 | 6  |
| Social        | Increased participation of vulnerable groups                                                                                                   | 1 | 2 | 1 | 1 | 2 | 7  |
| Social        | Connection to the existing cultural heritage                                                                                                   | 2 | 2 | 1 | 1 | 2 | 8  |
| Social        | Ease of use for end users of the solution                                                                                                      | 2 | 1 | 1 | 1 | 2 | 7  |
| Social        | Thermal comfort                                                                                                                                | 2 | 1 | 1 | 1 | 1 | 6  |
| Social        | Comfort conditions                                                                                                                             | 2 | 1 | 1 | 0 | 1 | 5  |
| Social        | Increased environmental awareness                                                                                                              | 2 | 1 | 1 | 1 | 2 | 7  |
| Social        | Local community involvement in the implementation and planning phase                                                                           | 2 | 1 | 1 | 1 | 2 | 7  |
| Social        | Increased citizen awareness of the potential of smart city projects                                                                            | 2 | 1 | 1 | 1 | 1 | 6  |
| Social        | Number of city officials and urban experts trained to conduct the meaningful and ethical engagement of citizens                                | 2 | 1 | 1 | 1 | 1 | 6  |
| Social        | Provision of a localized multi stakeholder co-creation and co-production Field Guide for Citizen Engagement                                    | 2 | 1 | 1 | 1 | 1 | 6  |
| Social        | Participation of citizens, citizen representative groups and citizen ambassadors in the co-creation of local/micro KPIs for Citizen Engagement | 2 | 1 | 1 | 1 | 1 | 6  |
| Social        | Number of municipal educational activities on the themes of Smart City every 1000 inhabitants                                                  | 1 | 1 | 2 | 1 | 2 | 7  |
| Social        | Number of municipal websites for citizens                                                                                                      | 0 | 2 | 2 | 1 | 2 | 7  |
| Social        | Number of interactive social media initiatives                                                                                                 | 0 | 2 | 2 | 1 | 1 | 6  |
| Social        | % of citizens' participation in online decision making                                                                                         | 2 | 1 | 2 | 1 | 1 | 7  |
| Social        | Residents project satisfaction                                                                                                                 | 2 | 1 | 1 | 0 | 1 | 5  |

|                   |                                                                                  |   |   |   |   |   |   |
|-------------------|----------------------------------------------------------------------------------|---|---|---|---|---|---|
| Social            | Degree of satisfaction                                                           | 2 | 1 | 1 | 1 | 2 | 7 |
| Social            | Residents involvement degree                                                     | 2 | 1 | 1 | 1 | 1 | 6 |
| Social            | Residents energy awareness                                                       | 2 | 1 | 1 | 1 | 1 | 6 |
| Social            | Stakeholder willingness to retrofit                                              | 2 | 1 | 1 | 0 | 2 | 6 |
| Social            | Active/proactive citizens's behaviour                                            | 2 | 1 | 1 | 1 | 1 | 6 |
| Social            | Citizens' perception in the social factors                                       | 1 | 1 | 1 | 1 | 1 | 5 |
| Social            | Range of people from diverse social backgrounds reached                          | 1 | 1 | 1 | 1 | 2 | 6 |
| Social            | Annual number of citizens engaged in the planning process per 100 000 population | 2 | 1 | 2 | 1 | 1 | 7 |
| <b>Governance</b> |                                                                                  |   |   |   |   |   |   |
| Governance        | Leadership                                                                       | 1 | 2 | 1 | 1 | 0 | 5 |
| Governance        | Balanced project team                                                            | 1 | 2 | 1 | 1 | 2 | 7 |
| Governance        | Involvement of the city administration                                           | 2 | 2 | 1 | 1 | 1 | 7 |
| Governance        | Clear division of responsibility                                                 | 1 | 2 | 1 | 1 | 1 | 6 |
| Governance        | Market orientation                                                               | 1 | 2 | 1 | 1 | 1 | 6 |
| Governance        | Cross-departmental integration                                                   | 1 | 2 | 1 | 1 | 1 | 6 |
| Governance        | Establishment within the administration                                          | 1 | 2 | 1 | 1 | 1 | 6 |
| Governance        | Monitoring and evaluation                                                        | 2 | 2 | 1 | 1 | 2 | 8 |
| Governance        | Bottom-up or top-down initiative                                                 | 0 | 1 | 1 | 1 | 1 | 4 |
| Governance        | Participatory governance                                                         | 1 | 1 | 2 | 1 | 1 | 6 |
| Governance        | Citizen participation                                                            | 1 | 1 | 2 | 1 | 2 | 7 |
| Governance        | Open public participation                                                        | 0 | 1 | 2 | 2 | 1 | 6 |
| Governance        | Smart city policy                                                                | 2 | 2 | 1 | 1 | 1 | 7 |
| Governance        | Municipal involvement Financial support                                          | 1 | 2 | 1 | 1 | 2 | 7 |
| Governance        | Smart city policy                                                                | 2 | 2 | 1 | 1 | 1 | 7 |
| Governance        | Legal Framework compatibility                                                    | 2 | 2 | 1 | 1 | 1 | 7 |
| Governance        | Natural disaster prevention policy                                               | 1 | 2 | 0 | 1 | 2 | 6 |
| Governance        | Open government dataset                                                          | 2 | 1 | 1 | 2 | 1 | 7 |
| Governance        | Policy makers response to e-Mobility demonstrators                               | 2 | 1 | 1 | 1 | 1 | 6 |
| Governance        | Perception of satisfaction with urban planning methodology                       | 1 | 1 | 1 | 1 | 1 | 5 |
| Governance        | Targeted people reached in urban planning methodology                            | 0 | 1 | 1 | 2 | 1 | 5 |
| Governance        | Perception of satisfaction with coaching / mentoring activity                    | 1 | 1 | 1 | 1 | 1 | 5 |
| Governance        | People reached in urban coaching/mentoring activities                            | 1 | 1 | 1 | 2 | 1 | 6 |
| Governance        | New rules / regulations due to the project                                       | 2 | 1 | 1 | 1 | 1 | 6 |
| Governance        | Signature and compliance with the Covenant of Mayors                             | 2 | 2 | 1 | 1 | 1 | 7 |
| Governance        | Existence of plans/programs to promote energy efficient buildings                | 2 | 2 | 1 | 2 | 2 | 9 |
| Governance        | Existence of regulations for development of energy efficient districts           | 2 | 1 | 1 | 2 | 1 | 7 |

|                    |                                                                                                |   |   |   |   |   |    |
|--------------------|------------------------------------------------------------------------------------------------|---|---|---|---|---|----|
| Governance         | Existence of plans/programs to promote sustainable mobility                                    | 1 | 2 | 1 | 2 | 2 | 8  |
| Governance         | Existence of regulations for development of sustainable mobility                               | 1 | 1 | 1 | 2 | 1 | 6  |
| Governance         | Annual number of online visits to the municipal open data portal per 100 000 population        | 2 | 2 | 2 | 2 | 2 | 10 |
| Governance         | Percentage of city services accessible and that can be requested online (e-Governance)         | 2 | 2 | 2 | 2 | 1 | 9  |
| Governance         | Average response time to inquiries made through the city's non-emergency inquiry system (days) | 0 | 1 | 2 | 2 | 1 | 6  |
| Governance         | Average time for building permit approval (days)                                               | 1 | 1 | 2 | 1 | 2 | 7  |
| Governance         | Percentage of service contracts providing city services which contain an open data policy      | 1 | 1 | 2 | 1 | 1 | 6  |
| Governance         | Public Sector e-Procurement                                                                    | 1 | 1 | 2 | 1 | 1 | 6  |
| Governance         | Smart city integrated services                                                                 | 2 | 1 | 2 | 1 | 1 | 7  |
| <b>Propagation</b> |                                                                                                |   |   |   |   |   |    |
| Propagation        | Social compatibility                                                                           | 2 | 1 | 1 | 1 | 2 | 7  |
| Propagation        | Technical compatibility                                                                        | 2 | 2 | 1 | 2 | 1 | 8  |
| Propagation        | Ease of use for end users of the solution                                                      | 2 | 1 | 1 | 1 | 2 | 7  |
| Propagation        | Ease of use for professional stakeholders                                                      | 1 | 1 | 1 | 1 | 1 | 5  |
| Propagation        | Triability                                                                                     | 1 | 1 | 1 | 1 | 1 | 5  |
| Propagation        | Advantages for end users                                                                       | 2 | 1 | 1 | 1 | 2 | 7  |
| Propagation        | Advantages for stakeholders                                                                    | 2 | 1 | 1 | 1 | 2 | 7  |
| Propagation        | Visibility of Results                                                                          | 2 | 1 | 1 | 1 | 2 | 7  |
| Propagation        | Solution(s) to development issues                                                              | 2 | 2 | 1 | 1 | 1 | 7  |
| Propagation        | Market demand                                                                                  | 2 | 2 | 1 | 2 | 2 | 9  |
| Propagation        | Changing professional norms                                                                    | 2 | 2 | 1 | 1 | 1 | 7  |
| Propagation        | Changing societal norms                                                                        | 1 | 1 | 1 | 1 | 1 | 5  |
| Propagation        | Diffusion to other locations                                                                   | 2 | 1 | 1 | 2 | 2 | 8  |
| Propagation        | Diffusion to other actors                                                                      | 1 | 1 | 1 | 1 | 1 | 5  |
| Propagation        | New forms of financing                                                                         | 2 | 1 | 1 | 1 | 2 | 7  |
| Propagation        | Smart city project visitors                                                                    | 2 | 1 | 1 | 1 | 2 | 7  |
